# Supplementary material for: Left Ventricular Assist Devices: A Primer For the General Cardiologist
Source: PubMed Central journal article supplement — J Am Heart Assoc. 2022 Dec 14;11(24):e027251. doi: 10.1161/JAHA.122.027251 (PMC9798797; doi:10.1161/jaha.122.027251), 2022-12-14
Supplement: JAH3-11-e027251-s001.pdf [file JAH3-11-e027251-s001.pdf]

# **SUPPLEMENTAL MATERIAL**

**Complete Membership: Future Leaders In Growing Heart Failure Therapies (FLIGHT) investigators**

|                         |                                         |
|-------------------------|-----------------------------------------|
| Aditya Bansal MD        | Ochsner Medical Center                  |
| Duc Thinh Pham MD       | Northwestern                            |
| Pavan Atluri MD         | Penn Medicine                           |
| Benjamin Sun MD         | Minneapolis Heart Institute             |
| Samer Najjar MD         | MedStar                                 |
| Sunit-Preet Chaudhry MD | St. Vincent's                           |
| Adam DeVore MD          | Duke Medical Center                     |
| Himabindu Vidula MD     | University of Rochester Medical Center  |
| Timothy Gong MD         | Baylor                                  |
| Karol Mudy MD           | Baptist Health - Arkansas               |
| Michael Nassif MD       | St. Luke's Medical Center – Kansas City |
| Edo Birati MD           | Poriya Medical Center, Israel           |
| Bryan Barrus MD         | Baptist Health – Arkansas               |
| Danyaal Moin MD         | Rutgers                                 |
| Noah Moss MD            | Mount Sinai                             |
| Omar Saeed MD           | Montefiore                              |
| Arman Kilic MD          | Medical University of South Carolina    |
| Samit Shah MD           | Northwell                               |
| Michael Genuardi MD     | Penn Medicine                           |
| Luke Cunningham MD      | INTEGRIS                                |
| Kunal Kotkar MD         | Barnes Jewish                           |
| Justin Hartupee MD      | Barnes Jewish                           |
| Albert Hicks III MD     | University of Maryland                  |
| Timothy Fendler MD      | St. Luke's Medical Center – Kansas City |
| Alex Briasoulis MD      | University of Athens, Greece            |
| Matthew Gonzalez MD     | Spectrum Health                         |
| Dmitry Yaranov MD       | Baptist Health, Memphis                 |
| Daizo Tanaka MD         | Henry Ford Medical Center               |
| John Barr Biglane MD    | St. Thomas West Hospital, Nashville     |

|                              |                                         |
|------------------------------|-----------------------------------------|
| William Fischer III MD       | St. Luke's Aurora Hospital, Milwaukee   |
| Devin Mehta MD               | Northwest Community Healthcare, Chicago |
| Tamas Alexy MD               | University of Minnesota                 |
| Sophia Airhart MD            | Providence Medical Center, Portland     |
| Dominic Emerson MD           | Cedars Sinai Medical Center             |
| Antonio Christophy MD        | Scripps – Mercy Memorial, California    |
| Anthony Castleberry MD       | University of Nebraska Medical Center   |
| Andrew Shaffer MD            | University of Minnesota                 |
| Jenna Kay MD                 | Providence Medical Center, Portland     |
| Marshall Hyden MD            | University of Nebraska Medical Center   |
| Shashank Sinha MD            | INOVA Fairfax                           |
| Jonathan Grinstein MD        | University of Chicago                   |
| Sriram Rao MD                | MedStar Washington                      |
| Nicole Cyrille Superville MD | Atrium Health, Charlotte                |
| Eric Jeng MD                 | University of Florida                   |
| Priyesh Patel MD             | Atrium Health, Charlotte                |
| Jason Feliberti MD           | Tampa General                           |
| David Snipelisky MD          | Cleveland Clinic, Florida               |
| Rohan Goswami MD             | Mayo Clinic, Florida                    |

**Table S1. Data for Figure 1 on Trends in the Rate of 1-year Survival Across Clinical Study Groups Over Time.**

| <b>Clinical Trial or Study Name</b>                                   | <b>Study Onset</b> | <b>Implant Strategy</b> | <b>Device(s)</b>              | <b>1-Year Survival</b> |
|-----------------------------------------------------------------------|--------------------|-------------------------|-------------------------------|------------------------|
| REMATCH Trial <sup>4</sup>                                            | 1998               | DT                      | HeartMate XVE                 | 52%                    |
| HeartMate II BTT Trial and continued-access protocol <sup>92,93</sup> | 2005               | BTT                     | HeartMate II                  | 73%                    |
| HeartMate II DT Trial <sup>9</sup>                                    | 2005               | DT                      | HeartMate II vs XVE           | HMII: 68%<br>XVE: 55%  |
| HeartMate II DT Trial continued-access protocol <sup>78</sup>         | 2007               | DT                      | HeartMate II                  | HMII: 73%              |
| INTERMACS study <sup>94</sup>                                         | 2008               | BTT                     | HeartMate II                  | 85%                    |
| ADVANCE Trial and continued-access protocol <sup>79,95</sup>          | 2008               | BTT                     | HeartWare VAD                 | 84%                    |
| ENDURANCE Trial <sup>55</sup>                                         | 2010               | DT                      | HeartWare VAD<br>HeartMate II | HVAD: 75%<br>HMII: 78% |
| ENDURANCE Supplemental Trial <sup>14</sup>                            | 2013               | DT                      | HeartWare VAD<br>HeartMate II | HVAD: 83%<br>HMII: 82% |

|                                    |      |                   |              |                                                                                        |
|------------------------------------|------|-------------------|--------------|----------------------------------------------------------------------------------------|
| MOMENTUM<br>3 <sup>54,96,97,</sup> | 2014 | BTT/BTC<br>and DT | HMII<br>HM 3 | HMII<br>BTT/BTC:<br>88%<br>HM3<br>BTT/BTC:<br>92%<br>HMII DT:<br>82%<br>HM3 DT:<br>84% |
|------------------------------------|------|-------------------|--------------|----------------------------------------------------------------------------------------|
